# Supplementary material for: Organoruthenium(ii) nucleoside conjugates as colon cytotoxic agents
Source: Royal Society of Chemistry journal article supplement (doi:10.1039/c8nj04515a), 2018-11-27
Supplement: c8nj04515a1.pdf [file c8nj04515a1.pdf]

Electronic Supporting Information

Organoruthenium(II) Nucleoside Conjugates as Colon Cytotoxic Agents

*Pedro R. Florindo,<sup>a\*</sup> Diane M. Pereira,<sup>b</sup> Pedro M. Borralho,<sup>b</sup> M. F. M. Piedade<sup>a,c</sup> M. Conceição Oliveira,<sup>e</sup> Ana M. Dias,<sup>a</sup> Cecília M.P. Rodrigues,<sup>b</sup> and Ana C. Fernandes.<sup>a\*</sup>*

<sup>a</sup> Centro de Química Estrutural, Instituto Superior Técnico, Universidade de Lisboa, Av. Rovisco Pais, 1049–001 Lisboa, Portugal.

<sup>b</sup> Research Institute for Medicines (iMed.Ulisboa), Faculty of Pharmacy, Universidade de Lisboa, Av. Prof. Gama Pinto, 1649–003 Lisboa, Portugal.

<sup>c</sup> Departamento de Química e Bioquímica, Faculdade de Ciências da Universidade de Lisboa, Campo Grande, 1749–016 Lisboa, Portugal.

**Electronic Supporting Information available:**

1. Spectroscopic characterization and combustion analysis: 1 – 6.
2. X-ray crystallographic data: 7.
3. Figure S1: 8-9.
4. Figure S2: 10.

**1. Spectroscopic characterization and combustion analysis.**

Ligand **L1**:  $\eta = 89\%$ ; FTIR (KBr):  $2230\text{ cm}^{-1}$  ( $\nu_{\text{C}\equiv\text{N}}$ );  $^1\text{H NMR}$  (DMSO-*d*<sub>6</sub>, 400 MHz): 1.84 (s, 3H, CH<sub>3</sub>), 2.01–2.22 (m, 2H, 2H<sub>2</sub>'), 3.53–3.64 (m, 2H, 2H<sub>5</sub>'), 3.78 (dd, 1H,  $J = 6.7, 3.5$ , H<sub>4</sub>'), 4.23–4.27 (m, 1H, H<sub>3</sub>'), 5.01–5.10 (comp., 3H, CH<sub>2</sub>Ph + OH), 5.24 (d, 1H,  $J = 4.2$ , OH), 6.20 (t, 1H,  $J = 6.6$ , H<sub>1</sub>'), 7.43 (d, 2H,  $J = 8.1$ , H<sub>2,6</sub>Ph), 7.78 (d, 2H,  $J = 8.1$ , H<sub>3,5</sub>Ph), 7.85 (s, 1H, H<sub>6</sub>);  $^{13}\text{C NMR}$  (DMSO-*d*<sub>6</sub>, 100 MHz): 12.9 (CH<sub>3</sub>), 40.5 (C<sub>2</sub>'), 43.6 (CH<sub>2</sub>Ph), 61.2 (C<sub>5</sub>'), 70.2 (C<sub>3</sub>'), 84.9 (C<sub>1</sub>'), 87.4 (C<sub>4</sub>'), 108.5 (C<sub>4</sub>Ph) 109.9 (C<sub>5</sub>), 118.7 (C $\equiv$ N), 128.3 (C<sub>2,6</sub>Ph), 132.3 (C<sub>3,5</sub>Ph), 135.3 (C<sub>6</sub>), 142.8 (C<sub>1</sub>Ph), 150.5 (C<sub>2</sub>), 162.6 (C<sub>4</sub>).

Ligand **L2**:  $\eta = 86\%$ ; FTIR (KBr):  $2231\text{ cm}^{-1}$  ( $\nu_{\text{C}\equiv\text{N}}$ );  $^1\text{H NMR}$  (DMSO-*d*<sub>6</sub>, 400 MHz): 1.85 (s, 3H, CH<sub>3</sub>), 2.29–2.35 (m, 1H, H<sub>2</sub>'), 2.40–2.45 (m, 1H, H<sub>2</sub>'), 3.59–3.68 (m, 2H, 2H<sub>5</sub>'), 3.84 (br, 1H, H<sub>4</sub>'), 4.40

(t, 1H,  $J = 6.0$ , H3'), 5.05 (m, 2H CH<sub>2</sub>Ph), 5.25 (br, 1H, OH), 6.13 (t, 1H,  $J = 5.6$ , H1'), 7.44 (d, 2H,  $J = 7.6$ , H<sub>2,6</sub>Ph), 7.78 (d, 2H,  $J = 7.7$ , H<sub>3,5</sub>Ph), 7.84 (s, 1H, H6). <sup>13</sup>C NMR (DMSO-*d*<sub>6</sub>, 100 MHz): 12.8 (CH<sub>3</sub>), 36.4 (C2'), 43.6 (CH<sub>2</sub>Ph), 59.8 (C3'), 60.6 (C5'), 84.2 (C4'), 84.6 (C1'), 108.6 (C<sub>4</sub>Ph) 110.0 (C5), 118.7 (C≡N), 128.3 (C<sub>2,6</sub>Ph), 132.3 (C<sub>3,5</sub>Ph), 135.3 (C6), 142.8 (C<sub>1</sub>Ph), 150.4 (C2), 162.6 (C4).

Ligand **L3**:  $\eta = 79$  %; FTIR (KBr): 2229 cm<sup>-1</sup> ( $\nu_{C\equiv N}$ ). <sup>1</sup>H NMR (DMSO-*d*<sub>6</sub>, 400 MHz): 2.12–2.23 (m, 2H, 2H2'), 3.55–3.58 (comp., 2H, 2H5'), 3.81 (t, 1H,  $J = 3.2$ , H4'), 4.22–4.27 (m, 1H, H3'), 5.07 (s, 2H, CH<sub>2</sub>Ph), 5.19 (t, 1H,  $J = 4.8$ , OH), 5.25 (d, 1H,  $J = 4.4$ , OH), 6.10 (t, 1H,  $J = 6.3$ , H1'), 7.45 (d, 2H,  $J = 8.1$ , H<sub>2,6</sub>Ph), 7.78 (d, 2H,  $J = 8.1$ , H<sub>3,5</sub>Ph), 8.55 (s, 1H, H6). <sup>13</sup>C NMR (DMSO-*d*<sub>6</sub>, 100 MHz): 41.0 (C2'), 44.9 (CH<sub>2</sub>Ph), 60.5 (C5'), 67.8 (C5), 69.6 (C3'), 85.9 (C1'), 87.8 (C4'), 110.0 (C<sub>4</sub>Ph) 118.7 (C≡N), 128.3 (C<sub>2,6</sub>Ph), 132.3 (C<sub>3,5</sub>Ph), 142.4 (C<sub>1</sub>Ph), 144.1 (C6), 150.2 (C2), 159.6 (C4).

Ligand **L4**:  $\eta = 82$  %; FTIR (KBr): 2230 cm<sup>-1</sup> ( $\nu_{C\equiv N}$ ); <sup>1</sup>H NMR (DMSO-*d*<sub>6</sub>, 400 MHz): 3.58–3.63 (m, 1H, H5'), 3.71–3.76 (m, 1H, H5'), 3.86–3.88 (m, 1H, H4'), 3.99–4.06 (comp., 2H, H2' + H3'), 5.02–5.10 (comp., 3H, CH<sub>2</sub>Ph + OH), 5.32 (t, 1H,  $J = 4.6$ , OH), 5.46 (d, 1H,  $J = 5.1$ , OH), 5.76 (t, 1H,  $J = 2.1$ , H1'), 7.49 (d, 2H,  $J = 8.1$ , H<sub>2,6</sub>Ph), 7.79 (d, 2H,  $J = 8.1$ , H<sub>3,5</sub>Ph), 8.50 (d, 1H,  $J_{H-F} = 7.2$ , H6). <sup>13</sup>C NMR (DMSO-*d*<sub>6</sub>, 100 MHz): 44.1 (CH<sub>2</sub>Ph), 59.9 (C5'), 68.9 (C2'), 74.0 (C3'), 84.5 (C4'), 89.6 (C1'), 110.1 (C<sub>4</sub>Ph) 118.7 (C≡N), 124.1 (d, <sup>2</sup> $J_{C-F} = 34.7$ , C6) 128.3 (C<sub>2,6</sub>Ph), 132.3 (C<sub>3,5</sub>Ph), 139.4 (d, <sup>1</sup> $J_{C-F} = 226.7$ , C5), 142.1 (C<sub>1</sub>Ph), 149.2 (C2), 156.5 (d, <sup>2</sup> $J_{C-F} = 26.1$ , C4).

Ligand **L5**:  $\eta = 79$  %; FTIR (KBr): 2230 cm<sup>-1</sup> ( $\nu_{C\equiv N}$ ). <sup>1</sup>H NMR (DMSO-*d*<sub>6</sub>, 400 MHz): 1.80 (s, 3H, CH<sub>3</sub>), 3.58–3.67 (m, 2H, 2H5'), 4.80 (br, 1H, H4'), 5.02–5.11 (comp., 3H, CH<sub>2</sub>Ph + OH), 5.93 (d, 1H,  $J = 5.8$ , H3'), 6.42 (d, 1H,  $J = 6.0$ , H2'), 6.87 (s, 1H, H1'), 7.45 (d, 2H,  $J = 8.0$ , H<sub>2,6</sub>Ph), 7.78–7.81 (comp., 3H, H<sub>3,5</sub>Ph + H6). <sup>13</sup>C NMR (DMSO-*d*<sub>6</sub>, 100 MHz): 12.8 (CH<sub>3</sub>), 43.6 (CH<sub>2</sub>Ph), 62.1 (C5'), 87.5 (C4'), 90.1 (C1'), 108.2 (C<sub>4</sub>Ph) 110.0 (C5), 118.7 (C≡N), 125.8 (C3'), 128.4 (C<sub>2,6</sub>Ph), 132.4 (C<sub>3,5</sub>Ph), 135.2 (C2'), 136.0 (C6), 142.8 (C<sub>1</sub>Ph), 150.9 (C2), 162.7 (C4). Anal. Calcd. for C<sub>18</sub>H<sub>17</sub>N<sub>3</sub>O<sub>4</sub>·0.1CH<sub>2</sub>Cl<sub>2</sub>: C, 62.50; H, 4.98; N, 12.08. Found: C, 62.13, H, 5.26; N, 12.21.

Ligand **L6**:  $\eta = 73$  %; FTIR (KBr): 2232 cm<sup>-1</sup> ( $\nu_{C\equiv N}$ ). <sup>1</sup>H NMR (DMSO-*d*<sub>6</sub>, 400 MHz): 0.83–0.86 (comp., 6H, 2CH<sub>3</sub>), 1.20–1.30 (comp., 16H, 8CH<sub>2</sub>), 1.49–1.54 (comp., 4H, CH<sub>2</sub>), 1.87 (s, 3H, CH<sub>3</sub>-Thy), 2.16–2.20 (m, 4H, 2CH<sub>2</sub>CO), 2.44–2.48 (m, 2H, 2H2'), 4.13–4.16 (m, 1H, H4'), 4.23–4.31 (m, 2H, 2H5'), 5.07 (s, 2H, CH<sub>2</sub>Ph), 5.22 (t, 1H,  $J = 3.2$ , H3'), 6.20 (t, 1H,  $J = 7.0$ , H1'), 7.40 (d, 2H,  $J = 8.0$ , H<sub>2,6</sub>Ph), 7.62 (s, 1H, H6), 7.85 (d, 2H,  $J = 8.0$ , H<sub>3,5</sub>Ph). <sup>13</sup>C NMR (DMSO-*d*<sub>6</sub>, 100 MHz): 12.7 (CH<sub>3</sub>-Thy), 13.9 (CH<sub>3</sub>), 22.0, 24.3, 28.3, 31.1, 33.3, 35.8 (CH<sub>2</sub>) 40.0 (C2'), 43.7 (CH<sub>2</sub>Ph), 63.4 (C5'), 73.6 (C3'), 81.2 (C4'), 85.2 (C1'), 109.1 (C<sub>4</sub>Ph) 110.0 (C5), 118.7 (C≡N), 128.4 (C<sub>2,6</sub>Ph), 132.3 (C<sub>3,5</sub>Ph), 135.1 (C6), 142.6 (C<sub>1</sub>Ph), 150.4 (C2), 162.5 (C4), 172.5, 172.7 (OC=O).

Compound **1Ru**: yellow;  $\eta = 86\%$ . FTIR (KBr):  $2234\text{ cm}^{-1}$  ( $\nu_{\text{C}\equiv\text{N}}$ ).  $^1\text{H}$  NMR (DMSO-*d*<sub>6</sub>, 400 MHz): 1.83 (s, 3H, CH<sub>3</sub>), 2.06–2.13 (m, 2H, 2H<sub>2</sub>'), 2.63–2.68 (m, 4H, CH<sub>2</sub>CH<sub>2</sub>, DPPE) 3.58–3.61 (m, 2H, 2H<sub>5</sub>'), 3.78 (br, 1H, H<sub>4</sub>'), 4.25 (br, 1H, H<sub>3</sub>'), 4.92 (comp., 7H,  $\eta^5\text{-C}_5\text{H}_5 + \text{CH}_2\text{Ph}$ ), 5.06 (br, 1H, OH), 5.26 (br, 1H, OH), 6.16 (t, 1H,  $J = 6.8$ , H<sub>1</sub>'), 6.55 (d, 2H,  $J = 8.0$ , H<sub>3,5</sub>Ph), 7.17 (d, 2H,  $J = 7.6$ , H<sub>2,6</sub>Ph), 7.08 (br, 4H, DPPE), 7.48–7.54 (m, 12H, DPPE), 7.84 (s, 1H, H<sub>6</sub>), 7.91 (br, 4H, DPPE).  $^{13}\text{C}$  NMR (DMSO-*d*<sub>6</sub>, 100 MHz): 12.9 (CH<sub>3</sub>), 27.4 (CH<sub>2</sub>CH<sub>2</sub>, DPPE), 40.0\* (C<sub>2</sub>'), 43.8 (CH<sub>2</sub>Ph), 61.2 (C<sub>5</sub>'), 70.2 (C<sub>3</sub>'), 82.1 ( $\eta^5\text{-C}_5\text{H}_5$ ), 84.9 (C<sub>1</sub>'), 87.4 (C<sub>4</sub>'), 108.5 (C<sub>4</sub>Ph), 109.0 (C<sub>5</sub>), 127.8 (C<sub>2,6</sub>Ph), 128.9 (t,  $J_{\text{CP}} = 4.8$ , C<sub>meta</sub>DPPE), 130.4 (d,  $J_{\text{CP}} = 22.1$ , C<sub>ipso</sub>DPPE), 130.7 (t,  $J_{\text{CP}} = 4.9$ , C<sub>ortho</sub>DPPE), 131.7 (C<sub>3,5</sub>Ph), 133.0 (t,  $J_{\text{CP}} = 5.1$ , C<sub>para</sub>DPPE), 135.3 (C<sub>6</sub>), 143.3 (C<sub>1</sub>Ph), 150.4 (C<sub>2</sub>), 162.6 (C<sub>4</sub>); C $\equiv$ N undisclosed; \* under DMSO signal.  $^{31}\text{P}$  NMR (DMSO-*d*<sub>6</sub>, 162 MHz): -144.2 (qt,  $J_{\text{PF}} = 711.2$ , PF<sub>6</sub><sup>-</sup>), 78.9 (DPPE). Anal. Calcd. for C<sub>49</sub>H<sub>48</sub>F<sub>6</sub>N<sub>3</sub>O<sub>5</sub>P<sub>3</sub>Ru·0.4CH<sub>2</sub>Cl<sub>2</sub>: C, 53.90; H, 4.47; N, 3.81. Found: C, 53.89; H, 4.35; N, 3.85.

Compound **2Ru**: yellow;  $\eta = 83\%$ . FTIR (KBr):  $2232\text{ cm}^{-1}$  ( $\nu_{\text{C}\equiv\text{N}}$ ).  $^1\text{H}$  NMR (DMSO-*d*<sub>6</sub>, 400 MHz): 1.86 (s, 3H, CH<sub>3</sub>), 2.09–2.15 (m, 2H, 2H<sub>2</sub>'), 3.59–3.64 (m, 2H, 2H<sub>5</sub>'), 3.80 (br, 1H, H<sub>4</sub>'), 4.28 (br, 1H, H<sub>3</sub>'), 4.66 (s, 5H,  $\eta^5\text{-C}_5\text{H}_5$ ), 5.04–5.08 (comp., 3H, CH<sub>2</sub>Ph + OH), 5.28 (br, 1H, OH), 6.21 (t, 1H,  $J = 6.4$ , H<sub>1</sub>'), 7.08 (br, 14H, H<sub>3,5</sub>Ph + PPh<sub>3</sub>), 7.30–7.43 (comp., 24H, H<sub>2,6</sub>Ph + PPh<sub>3</sub>), 7.88 (s, 1H, H<sub>6</sub>).  $^{13}\text{C}$  NMR (DMSO-*d*<sub>6</sub>, 100 MHz): 12.9 (CH<sub>3</sub>), 40.0\* (C<sub>2</sub>'), 43.1 (CH<sub>2</sub>Ph), 61.2 (C<sub>5</sub>'), 70.2 (C<sub>3</sub>'), 84.0 ( $\eta^5\text{-C}_5\text{H}_5$ ), 85.0 (C<sub>1</sub>'), 87.5 (C<sub>4</sub>'), 108.5 (C<sub>4</sub>Ph), 109.5 (C<sub>5</sub>), 128.3 (C<sub>2,6</sub>Ph), 128.4 (t,  $J_{\text{CP}} = 4.6$ , C<sub>meta</sub>PPh<sub>3</sub>), 130.1 (C<sub>para</sub>PPh<sub>3</sub>), 132.3 (C<sub>3,5</sub>Ph), 132.9 (t,  $J_{\text{CP}} = 5.1$ , C<sub>ortho</sub>PPh<sub>3</sub>), 135.1 (d,  $J_{\text{CP}} = 22.1$ , C<sub>ipso</sub>PPh<sub>3</sub>), 135.4 (C<sub>6</sub>), 143.7 (C<sub>1</sub>Ph), 150.5 (C<sub>2</sub>), 162.6 (C<sub>4</sub>); C $\equiv$ N undisclosed; \* under DMSO signal.  $^{31}\text{P}$  NMR (DMSO-*d*<sub>6</sub>, 162 MHz): -144.2 (qt,  $J_{\text{PF}} = 711.4$ , PF<sub>6</sub><sup>-</sup>), 41.7 (PPh<sub>3</sub>). Anal. Calcd. for C<sub>59</sub>H<sub>54</sub>F<sub>6</sub>N<sub>3</sub>O<sub>5</sub>P<sub>3</sub>Ru·0.4CH<sub>2</sub>Cl<sub>2</sub>: C, 58.14; H, 4.50; N, 3.42. Found: C, 58.00, H, 4.34; N, 3.51.

Compound **3Ru**: yellow;  $\eta = 89\%$ ; FTIR (KBr):  $2233\text{ cm}^{-1}$  ( $\nu_{\text{C}\equiv\text{N}}$ );  $^1\text{H}$  NMR (DMSO-*d*<sub>6</sub>, 400 MHz): 1.83 (s, 3H, CH<sub>3</sub>), 2.27–2.33 (m, 2H, 2H<sub>2</sub>'), 2.37–2.44 (m, 2H, 2H<sub>2</sub>'), 2.57–2.77 (m, 4H, CH<sub>2</sub>CH<sub>2</sub>, DPPE) 3.59–3.70 (m, 2H, 2H<sub>5</sub>'), 3.82–3.86 (br, 1H, H<sub>4</sub>'), 4.40 (dd, 1H,  $J = 12.4, 5.5$ , H<sub>3</sub>'), 4.92 (comp., 7H,  $\eta^5\text{-C}_5\text{H}_5 + \text{CH}_2\text{Ph}$ ), 5.25 (t, 1H,  $J = 5.0$ , OH), 6.08 (t, 1H,  $J = 6.4$ , H<sub>1</sub>'), 6.55 (d, 2H,  $J = 8.2$ , H<sub>3,5</sub>Ph), 7.17 (d, 2H,  $J = 8.4$ , H<sub>2,6</sub>Ph), 7.34 (br, 4H, DPPE), 7.48–7.55 (m, 12H, DPPE), 7.82 (s, 1H, H<sub>6</sub>), 7.89–7.93 (br, 4H, DPPE).  $^{13}\text{C}$  NMR (DMSO-*d*<sub>6</sub>, 100 MHz): 13.3 (CH<sub>3</sub>), 27.5 (CH<sub>2</sub>CH<sub>2</sub>, DPPE), 36.9 (C<sub>2</sub>'), 44.0 (CH<sub>2</sub>Ph), 60.3 (C<sub>3</sub>'), 61.5 (C<sub>5</sub>'), 82.6 ( $\eta^5\text{-C}_5\text{H}_5$ ), 84.7 (C<sub>4</sub>'), 85.0 (C<sub>1</sub>'), 109.0 (C<sub>4</sub>Ph), 109.5 (C<sub>5</sub>), 128.3 (C<sub>2,6</sub>Ph), 129.4 (t,  $J_{\text{CP}} = 4.8$ , C<sub>meta</sub>DPPE), 130.9 (d,  $J_{\text{CP}} = 42.5$ , C<sub>ipso</sub>DPPE), 131.2 (t,  $J_{\text{CP}} = 5.1$ , C<sub>ortho</sub>DPPE), 132.2 (C<sub>3,5</sub>Ph), 133.5 (t,  $J_{\text{CP}} = 5.2$ , C<sub>para</sub>DPPE), 135.8 (C<sub>6</sub>), 143.7 (C<sub>1</sub>Ph), 150.8 (C<sub>2</sub>), 163.0 (C<sub>4</sub>); C $\equiv$ N undisclosed.  $^{31}\text{P}$  NMR (DMSO-*d*<sub>6</sub>, 162 MHz): -144.2 (qt,  $J_{\text{PF}} = 713.2$ , PF<sub>6</sub><sup>-</sup>),

78.9 (DPPE). Anal. Calcd. for  $C_{49}H_{47}F_6N_6O_4P_3Ru \cdot 0.2CH_2Cl_2$ : C, 53.28; H, 4.31; N, 7.58. Found: C, 53.10; H, 4.24; N, 7.33.

Compound **4Ru**: yellow;  $\eta = 89\%$ ; FTIR (KBr):  $2233\text{ cm}^{-1}$  ( $\nu_{C\equiv N}$ );  $^1H$  NMR (DMSO-*d*<sub>6</sub>, 400 MHz): 1.87 (s, 3H, CH<sub>3</sub>), 2.30–2.47 (m, 2H, 2H<sub>2</sub>'), 3.60–3.68 (m, 2H, 2H<sub>5</sub>'), 3.86 (br, 1H, H<sub>4</sub>'), 4.43 (br, 1H, H<sub>3</sub>'), 4.67 (s, 5H,  $\eta^5$ -C<sub>5</sub>H<sub>5</sub>), 5.06 (s, 2H CH<sub>2</sub>Ph), 5.27 (br, 1H, OH), 6.13 (s, 1H, H<sub>1</sub>'), 7.08 (br, 14H, H<sub>3,5</sub>Ph + PPh<sub>3</sub>), 7.30–7.45 (comp, 20H, H<sub>2,6</sub>Ph + PPh<sub>3</sub>), 7.86 (s, 1H, H<sub>6</sub>).  $^{13}C$  NMR (DMSO-*d*<sub>6</sub>, 100 MHz): 12.9 (CH<sub>3</sub>), 36.4 (C<sub>2</sub>'), 43.6 (CH<sub>2</sub>Ph), 59.8 (C<sub>3</sub>'), 60.6 (C<sub>5</sub>'), 84.1 ( $\eta^5$ -C<sub>5</sub>H<sub>5</sub>), 84.6 (C<sub>4</sub>'), 86.1 (C<sub>1</sub>'), 108.6 (C<sub>4</sub>Ph) 109.9 (C<sub>5</sub>), 128.3 (C<sub>2,6</sub>Ph), 128.4 (t,  $J_{CP} = 4.5$ , C<sub>meta</sub>PPh<sub>3</sub>), 130.1 (C<sub>para</sub>PPh<sub>3</sub>) 132.3 (C<sub>3,5</sub>Ph), 132.9 (t,  $J_{CP} = 5.1$ , C<sub>ortho</sub>PPh<sub>3</sub>), 135.2 (comp., C<sub>ipso</sub>PPh<sub>3</sub> + C<sub>6</sub>), 143.6 (C<sub>1</sub>Ph), 150.4 (C<sub>2</sub>), 162.6 (C<sub>4</sub>); C≡N undisclosed.  $^{31}P$  NMR (DMSO-*d*<sub>6</sub>, 162 MHz): -144.2 (qt,  $J_{PF} = 710.4$ , PF<sub>6</sub><sup>-</sup>), 41.6 (PPh<sub>3</sub>). Anal. Calcd. for  $C_{59}H_{53}F_6N_6O_4P_3Ru \cdot 0.5CH_2Cl_2$ : C, 56.69; H, 4.32; N, 6.67. Found: C, 56.36; H, 4.31; N, 6.55.

Compound **5Ru**: yellow;  $\eta = 82\%$ ; FTIR (KBr):  $2234\text{ cm}^{-1}$  ( $\nu_{C\equiv N}$ ).  $^1H$  NMR (DMSO-*d*<sub>6</sub>, 400 MHz): 2.36–2.45 (m, 2H, 2H<sub>2</sub>'), 2.64–2.69 (m, 4H, CH<sub>2</sub>CH<sub>2</sub>, DPPE) 3.56–3.68 (m, 2H, 2H<sub>5</sub>'), 3.82 (d, 1H,  $J = 3.2$ , H<sub>4</sub>'), 4.26 (br, 1H, H<sub>3</sub>'), 4.92 (s, 5H,  $\eta^5$ -C<sub>5</sub>H<sub>5</sub>), 4.94 (s, 2H, CH<sub>2</sub>Ph), 5.20 (t, 1H,  $J = 4.6$ , OH), 5.26 (d, 1H,  $J = 4.2$ , OH), 6.07 (t, 1H,  $J = 6.2$ , H<sub>1</sub>'), 6.55 (d, 2H,  $J = 8.2$ , H<sub>3,5</sub>Ph), 7.19 (d, 2H,  $J = 8.2$ , H<sub>2,6</sub>Ph), 7.35 (br, 4H, DPPE), 7.48–7.56 (m, 12H, DPPE), 7.89–7.93 (br, 4H, DPPE), 8.54 (s, 1H, H<sub>6</sub>).  $^{13}C$  NMR (DMSO-*d*<sub>6</sub>, 100 MHz): 27.8 (CH<sub>2</sub>CH<sub>2</sub>, DPPE), 40.0\* (C<sub>2</sub>'), 45.3 (CH<sub>2</sub>Ph), 61.0 (C<sub>5</sub>'), 68.3 (C<sub>5</sub>), 70.1 (C<sub>3</sub>'), 82.6 ( $\eta^5$ -C<sub>5</sub>H<sub>5</sub>), 86.3 (C<sub>1</sub>'), 88.2 (C<sub>4</sub>'), 109.5 (C<sub>4</sub>Ph), 128.3 (C<sub>2,6</sub>Ph), 129.4 (t,  $J_{CP} = 4.8$ , C<sub>meta</sub>DPPE), 130.9 (d,  $J_{CP} = 43.8$ , C<sub>ipso</sub>DPPE), 131.3 (t,  $J_{CP} = 5.2$ , C<sub>ortho</sub>DPPE), 132.2 (C<sub>3,5</sub>Ph), 133.5 (m, C<sub>para</sub>DPPE), 143.3 (C<sub>1</sub>Ph), 144.6 (C<sub>6</sub>), 150.2 (C<sub>2</sub>), 159.6 (C<sub>4</sub>); C≡N undisclosed; \* under DMSO signal.  $^{31}P$  NMR (DMSO-*d*<sub>6</sub>, 162 MHz): -144.2 (qt,  $J_{PF} = 712.1$ , PF<sub>6</sub><sup>-</sup>), 78.9 (DPPE). Anal. Calcd. for  $C_{48}H_{45}F_6IN_3O_5P_3Ru \cdot 0.1CH_2Cl_2$ : C, 48.65; H, 3.84; N, 3.54. Found: C, 48.36; H, 3.74; N, 3.41

Compound **6Ru**: yellow;  $\eta = 79\%$ ; FTIR (KBr):  $2230\text{ cm}^{-1}$  ( $\nu_{C\equiv N}$ ).  $^1H$  NMR (DMSO-*d*<sub>6</sub>, 400 MHz): 2.16–2.20 (m, 2H, 2H<sub>2</sub>'), 3.58–3.68 (m, 2H, 2H<sub>5</sub>'), 3.83 (d, 1H,  $J = 3.0$ , H<sub>4</sub>'), 4.27 (m, 1H,  $J = 3.9$ , H<sub>3</sub>'), 4.66 (s, 5H,  $\eta^5$ -C<sub>5</sub>H<sub>5</sub>) 5.08 (s, 2H, CH<sub>2</sub>Ph), 5.26 (br, 2H, 2OH), 6.11 (t, 1H,  $J = 6.3$ , H<sub>1</sub>'), 7.08 (comp., 14H, H<sub>2,6</sub>Ph + PPh<sub>3</sub>), 7.31–7.45 (comp., 20H, H<sub>3,5</sub>Ph + PPh<sub>3</sub>), 8.58 (s, 1H, H<sub>6</sub>).  $^{13}C$  NMR (DMSO-*d*<sub>6</sub>, 100 MHz): 40.0\* (C<sub>2</sub>'), 44.9 (CH<sub>2</sub>Ph), 60.8 (C<sub>5</sub>'), 67.9 (C<sub>5</sub>), 69.6 (C<sub>3</sub>'), 84.1 ( $\eta^5$ -C<sub>5</sub>H<sub>5</sub>), 85.9 (C<sub>1</sub>'), 87.7 (C<sub>4</sub>'), 109.5 (C<sub>4</sub>Ph), 128.3 (C<sub>2,6</sub>Ph), 128.4 (t,  $J_{CP} = 4.6$ , C<sub>meta</sub>PPh<sub>3</sub>), 130.1 (C<sub>para</sub>PPh<sub>3</sub>) 132.3 (C<sub>3,5</sub>Ph), 132.9 (t,  $J_{CP} = 5.2$ , C<sub>ortho</sub>PPh<sub>3</sub>), 135.2 (t,  $J_{CP} = 21.2$ , C<sub>ipso</sub>PPh<sub>3</sub>), 143.3 (C<sub>1</sub>Ph), 144.3 (C<sub>6</sub>), 150.2 (C<sub>2</sub>), 159.6 (C<sub>4</sub>); C≡N undisclosed; \* under DMSO signal.  $^{31}P$  NMR (DMSO-*d*<sub>6</sub>, 162 MHz): -144.2 (qt,  $J_{PF} = 710.5$ , PF<sub>6</sub><sup>-</sup>), 41.7 (PPh<sub>3</sub>). Anal. Calcd. for  $C_{58}H_{51}F_6IN_3O_5P_3Ru$ : C, 53.38; H, 3.94; N, 3.22. Found: C, 53.02; H, 4.08; N, 3.17.

Compound **7Ru**: yellow;  $\eta = 79\%$ . FTIR (KBr):  $2232\text{ cm}^{-1}$  ( $\nu_{\text{C}\equiv\text{N}}$ ).  $^1\text{H}$  NMR (DMSO-*d*<sub>6</sub>, 400 MHz): 2.63–2.70 (m, 4H, CH<sub>2</sub>CH<sub>2</sub>, DPPE) 3.61 (d, 1H,  $J = 11.5$ , H5'), 3.73 (d, 1H,  $J = 12.0$ , H5'), 3.88 (br, 1H, H4'), 4.01 (br, 2H, H2' + H3'), 4.92 (comp., 7H,  $\eta^5\text{-C}_5\text{H}_5$  + CH<sub>2</sub>Ph), 5.12 (d, 1H,  $J = 4.6$ , OH), 5.33 (t, 1H,  $J = 4.2$ , OH), 5.42 (t, 1H,  $J = 4.2$ , OH), 5.72 (s, 1H, H1'), 6.55 (d, 2H,  $J = 8.2$ , H<sub>3,5</sub>Ph), 7.23 (d, 2H,  $J = 8.2$ , H<sub>2,6</sub>Ph), 7.35 (br, 4H, DPPE), 7.48–7.54 (m, 12H, DPPE), 7.89–7.93 (br, 4H, DPPE), 8.49 (d, 1H,  $J_{\text{HF}} = 7.1$ , H6).  $^{13}\text{C}$  NMR (DMSO-*d*<sub>6</sub>, 100 MHz): 27.0 (CH<sub>2</sub>CH<sub>2</sub>, DPPE), 44.0 (CH<sub>2</sub>Ph), 59.9 (C5'), 68.9 (C2'), 74.0 (C3'), 82.1 ( $\eta^5\text{-C}_5\text{H}_5$ ), 84.6 (C4'), 89.5 (C1'), 109.2 (C<sub>4</sub>Ph), 109.5 (C5), 127.8 (C<sub>2,6</sub>Ph), 128.9 (m, C<sub>meta</sub>DPPE), 130.4 (d,  $J_{\text{CP}} = 42.5$ , C<sub>ipso</sub>DPPE), 130.8 (m, C<sub>ortho</sub>DPPE), 131.7 (C<sub>3,5</sub>Ph), 133.1 (m, C<sub>para</sub>DPPE), 136.9 (C6), 142.5 (C<sub>1</sub>Ph), 149.1 (C2), 156.3 (C4); C≡N undisclosed.  $^{31}\text{P}$  NMR (DMSO-*d*<sub>6</sub>, 162 MHz): -144.2 (qt,  $J_{\text{PF}} = 710.7$ , PF<sub>6</sub><sup>-</sup>), 78.9 (DPPE). Anal. Calcd. for C<sub>48</sub>H<sub>45</sub>F<sub>7</sub>N<sub>3</sub>O<sub>6</sub>P<sub>3</sub>Ru·0.5CH<sub>2</sub>Cl<sub>2</sub>: C, 51.58; H, 4.11; N, 3.72. Found: C, 51.32; H, 3.96; N, 3.73.

Compound **8Ru**: yellow;  $\eta = 79\%$ . FTIR (KBr):  $2229\text{ cm}^{-1}$  ( $\nu_{\text{C}\equiv\text{N}}$ ).  $^1\text{H}$  NMR (DMSO-*d*<sub>6</sub>, 400 MHz): 3.57–3.61 (m, 1H, H5'), 3.70–3.75 (m, 1H, H5'), 3.84–3.87 (m, 1H, H4'), 4.00 (br, 2H, H2' + H3'), 4.66 (s, 5H,  $\eta^5\text{-C}_5\text{H}_5$ ), 4.92 (s, 2H, CH<sub>2</sub>Ph), 5.12 (d, 1H,  $J = 4.6$ , OH), 5.33 (t, 1H,  $J = 4.2$ , OH), 5.42 (t, 1H,  $J = 4.2$ , OH), 5.72 (s, 1H, H1'), 7.08 (br, 14H, H<sub>3,5</sub>Ph + PPh<sub>3</sub>), 7.30–7.43 (comp., 24H, H<sub>2,6</sub>Ph + PPh<sub>3</sub>), 8.49 (d, 1H,  $J_{\text{HF}} = 7.1$ , H6).  $^{13}\text{C}$  NMR (DMSO-*d*<sub>6</sub>, 100 MHz): 44.0 (CH<sub>2</sub>Ph), 59.8 (C5'), 69.1 (C2'), 74.2 (C3'), 84.1 ( $\eta^5\text{-C}_5\text{H}_5$ ), 84.6 (C4'), 89.5 (C1'), 109.1 (C<sub>4</sub>Ph), 109.5 (C5), 127.7 (C<sub>2,6</sub>Ph), 128.4 (t,  $J_{\text{CP}} = 4.6$ , C<sub>meta</sub>PPh<sub>3</sub>), 130.1 (C<sub>para</sub>PPh<sub>3</sub>), 132.3 (C<sub>3,5</sub>Ph), 132.9 (t,  $J_{\text{CP}} = 5.1$ , C<sub>ortho</sub>PPh<sub>3</sub>), 135.1 (d,  $J_{\text{CP}} = 22.1$ , C<sub>ipso</sub>PPh<sub>3</sub>), 136.9 (C6), 142.5 (C<sub>1</sub>Ph), 149.1 (C2), 156.3 (C4); C≡N undisclosed.  $^{31}\text{P}$  NMR (DMSO-*d*<sub>6</sub>, 162 MHz): -144.2 (qt,  $J_{\text{PF}} = 711.4$ , PF<sub>6</sub><sup>-</sup>), 41.5 (PPh<sub>3</sub>). Anal. Calcd. for C<sub>58</sub>H<sub>51</sub>F<sub>7</sub>N<sub>3</sub>O<sub>6</sub>P<sub>3</sub>Ru: C, 57.43; H, 4.24; N, 3.46. Found: C, 57.77; H, 3.93; N, 3.15.

Compound **9Ru**: yellow;  $\eta = 81\%$ ; FTIR (KBr):  $2233\text{ cm}^{-1}$  ( $\nu_{\text{C}\equiv\text{N}}$ ).  $^1\text{H}$  NMR (DMSO-*d*<sub>6</sub>, 400 MHz): 1.78 (s, 3H, CH<sub>3</sub>), 2.63–2.68 (m, 4H, CH<sub>2</sub>CH<sub>2</sub>, DPPE) 3.62 (m, 2H, 2H5'), 4.80 (br, 1H, H4'), 4.89–4.94 (comp., 7H,  $\eta^5\text{-C}_5\text{H}_5$  + CH<sub>2</sub>Ph), 5.03 (br, 1H, OH), 5.91 (d, 1H,  $J = 5.9$ , H3'), 6.43 (d, 1H,  $J = 5.8$ , H2'), 6.57 (d, 2H,  $J = 8.0$ , H<sub>3,5</sub>Ph), 6.83 (s, 1H, H1'), 7.19 (d, 2H,  $J = 8.0$ , H<sub>2,6</sub>Ph), 7.31–7.39 (m, 4H, DPPE), 7.45–7.55 (m, 12H, DPPE), 7.78 (s, 1H, H6), 7.88–7.93 (m, 4H, DPPE).  $^{13}\text{C}$  NMR (DMSO-*d*<sub>6</sub>, 100 MHz): 12.7 (CH<sub>3</sub>), 27.2 (CH<sub>2</sub>CH<sub>2</sub>, DPPE), 43.5 (CH<sub>2</sub>Ph), 62.1 (C5'), 82.1 ( $\eta^5\text{-C}_5\text{H}_5$ ), 87.5 (C4'), 90.0 (C1'), 108.1 (C<sub>4</sub>Ph), 109.0 (C5), 125.7 (C3'), 127.9 (C<sub>2,6</sub>Ph), 128.9 (t,  $J_{\text{CP}} = 4.6$ , C<sub>meta</sub>DPPE), 130.3 (d,  $J_{\text{CP}} = 44.3$ , C<sub>ipso</sub>DPPE), 130.6 (t,  $J_{\text{CP}} = 5.1$ , C<sub>ortho</sub>DPPE), 131.7 (C<sub>3,5</sub>Ph), 133.0 (m, C<sub>para</sub>DPPE), 135.2 (C2'), 136.0 (C6), 143.2 (C<sub>1</sub>Ph), 150.7 (C2), 162.6 (C4); C≡N undisclosed.  $^{31}\text{P}$  NMR (DMSO-*d*<sub>6</sub>, 162 MHz): -144.2 (qt,  $J_{\text{PF}} = 712.2$ , PF<sub>6</sub><sup>-</sup>), 78.9 (DPPE). Anal. Calcd. for C<sub>49</sub>H<sub>46</sub>F<sub>6</sub>N<sub>3</sub>O<sub>4</sub>P<sub>3</sub>Ru: C, 56.11; H, 4.42; N, 4.01. Found: C, 56.47; H, 4.31; N, 3.78.

Compound **10Ru**: yellow;  $\eta = 85\%$ ; FTIR (KBr):  $2232\text{ cm}^{-1}$  ( $\nu_{\text{C}\equiv\text{N}}$ ).  $^1\text{H}$  NMR (DMSO-*d*<sub>6</sub>, 400 MHz): 1.82 (s, 3H, CH<sub>3</sub>), 3.64 (m, 2H, 2H5'), 4.67 (s, 5H,  $\eta^5\text{-C}_5\text{H}_5$ ), 4.82 (br, 1H, H4'), 5.03–5.13 (comp.,

3H, CH<sub>2</sub>Ph + OH), 5.94 (d, 1H, *J* = 5.2, H3'), 6.45 (d, 1H, *J* = 5.3, H2'), 6.88 (s, 1H, H1'), 7.05–7.11 (comp., 14H, H<sub>3,5</sub>Ph + PPh<sub>3</sub>), 7.28–7.44 (comp., 14H, H<sub>2,6</sub>Ph + PPh<sub>3</sub>), 7.82 (s, 1H, H6). <sup>13</sup>C NMR (DMSO-*d*6, 100 MHz): 12.8 (CH<sub>3</sub>), 43.6 (CH<sub>2</sub>Ph), 62.1 (C5'), 84.1 (*η*<sup>5</sup>-C<sub>5</sub>H<sub>5</sub>), 87.5 (C4'), 90.1 (C1'), 108.2 (C<sub>4</sub>Ph) 110.0 (C5), 125.8 (C3'), 128.2–128.4 (C<sub>2,6</sub>Ph + C<sub>meta</sub>PPh<sub>3</sub>), 130.1 (C<sub>para</sub>PPh<sub>3</sub>) 132.4 (C<sub>3,5</sub>Ph), 132.9 (C<sub>ortho</sub>PPh<sub>3</sub>), 135.2 (C<sub>ipso</sub>PPh<sub>3</sub>), 135.4 (C2'), 136.1 (C6), 142.8 (C<sub>1</sub>Ph), 150.9 (C2), 162.7 (C4); C≡N undisclosed. <sup>31</sup>P NMR (DMSO-*d*6, 162 MHz): -144.2 (qt, *J*<sub>PF</sub> = 710.7, PF<sub>6</sub><sup>-</sup>), 41.6 (PPh<sub>3</sub>). Anal. Calcd. for C<sub>59</sub>H<sub>52</sub>F<sub>6</sub>N<sub>3</sub>O<sub>4</sub>P<sub>3</sub>Ru: C, 60.31; H, 4.46; N, 3.58. Found: C, 60.62; H, 4.15; N, 3.69.

Compound **11Ru**: yellow; *η* = 74 %; FTIR (KBr): 2234 cm<sup>-1</sup> (ν<sub>C≡N</sub>). <sup>1</sup>H NMR (DMSO-*d*6, 400 MHz): 0.84–0.89 (comp., 6H, 2CH<sub>3</sub>Oct), 1.24 (comp., 16H, 8CH<sub>2</sub>, Oct), 1.51–1.54 (comp., 4H, CH<sub>2</sub>, Oct), 1.83 (s, 3H, CH<sub>3</sub>Thy), 2.32–2.36 (comp., 5H, 2CH<sub>2</sub>CO + H2'), 2.44–2.48 (m, 1H, H2'), 2.62–2.69 (m, 4H, CH<sub>2</sub>CH<sub>2</sub>, DPPE) 4.15 (br, 1H, H4'), 4.27 (m, 2H, 2H5'), 4.88–4.99 (comp., 7H, CH<sub>2</sub>Ph + *η*<sup>5</sup>-C<sub>5</sub>H<sub>5</sub>), 5.23 (br, 1H, H3'), 6.16 (t, 1H, *J* = 6.8, H1'), 6.55 (d, 2H, *J* = 8.0, H<sub>3,5</sub>Ph), 7.18 (d, 2H, *J* = 8.0, H<sub>2,6</sub>Ph), 7.35 (br, 4H, DPPE), 7.48–7.54 (m, 12H, DPPE), 7.60 (s, 1H, H6), 7.89–7.93 (m, 4H, DPPE). <sup>13</sup>C NMR (DMSO-*d*6, 100 MHz): 12.7 (CH<sub>3</sub>Thy), 13.8, 13.9 (CH<sub>3</sub>Oct), 22.0, 24.3 (CH<sub>2</sub>, Oct), 27.3 (CH<sub>2</sub>CH<sub>2</sub>, DPPE) 28.3, 31.0, 33.3 (CH<sub>2</sub>, Oct), 40.0\* (C2'), 43.8 (CH<sub>2</sub>Ph), 63.3 (C5'), 73.5 (C3'), 81.1 (C4'), 82.1 (*η*<sup>5</sup>-C<sub>5</sub>H<sub>5</sub>), 85.2 (C1'), 109.0 (C<sub>4</sub>Ph, C5), 127.8 (C<sub>2,6</sub>Ph), 128.9–129.0 (m, C<sub>meta</sub>DPPE), 130.4 (d, *J*<sub>CP</sub> = 40.3, C<sub>ipso</sub>DPPE), 130.7 (t, *J*<sub>CP</sub> = 5.0, C<sub>ortho</sub>DPPE), 131.7 (C<sub>3,5</sub>Ph), 133.0 (t, *J*<sub>CP</sub> = 5.1, C<sub>para</sub>DPPE), 135.1 (C6), 143.1 (C<sub>1</sub>Ph), 150.3 (C2), 162.5 (C4), 172.5, 172.7 (OC=O); C≡N undisclosed. <sup>31</sup>P NMR (DMSO-*d*6, 162 MHz): -144.2 (qt, *J*<sub>PF</sub> = 710.5, PF<sub>6</sub><sup>-</sup>), 78.9 (PPh<sub>3</sub>). Anal. Calcd. for C<sub>65</sub>H<sub>76</sub>F<sub>6</sub>N<sub>3</sub>O<sub>7</sub>P<sub>3</sub>Ru·0.5CH<sub>2</sub>Cl<sub>2</sub>: C, 57.77; H, 5.69; N, 3.09. Found: C, 57.46; H, 5.37; N, 3.20.

## 2– X-ray crystallographic data

Table S1. Crystal data and structure refinement parameters for compounds **3Ru**.

| Compound                                           | <b>3Ru</b>                                                                                     |
|----------------------------------------------------|------------------------------------------------------------------------------------------------|
| Empirical formula                                  | C <sub>49</sub> H <sub>41</sub> F <sub>6</sub> N <sub>6</sub> O <sub>4</sub> P <sub>3</sub> Ru |
| Formula weight                                     | 1085.86                                                                                        |
| Temperature                                        | 150(2) K                                                                                       |
| Wavelength                                         | 0.71073 Å                                                                                      |
| Crystal system                                     | Triclinic                                                                                      |
| space group                                        | P -1                                                                                           |
| <i>a</i> /Å                                        | 9.1748(9)                                                                                      |
| <i>b</i> /Å                                        | 14.2480(13)                                                                                    |
| <i>c</i> /Å                                        | 19.9453(18)                                                                                    |
| <i>α</i> /deg.                                     | 108.534(4)                                                                                     |
| <i>β</i> / deg.                                    | 93.246(5)                                                                                      |
| <i>γ</i> / deg.                                    | 105.595(4)                                                                                     |
| <i>V</i> /Å <sup>3</sup>                           | 2352.1(4)                                                                                      |
| <i>Z</i>                                           | 2                                                                                              |
| <i>d</i> <sub>calcd</sub> /g·cm <sup>-3</sup>      | 1.533                                                                                          |
| <i>μ</i> /mm <sup>-1</sup>                         | 0.512                                                                                          |
| F(000)                                             | 1104                                                                                           |
| <i>θ</i> limits/deg                                | 2.389 to 26.078                                                                                |
| Limiting indices                                   | -11<= <i>h</i> <=11;<br>-17<= <i>k</i> <=16;<br>-19<= <i>l</i> <=24                            |
| Reflections collected/unique                       | 34065/9184<br>[R(int) = 0.0531]                                                                |
| Completeness to <i>θ</i> /deg, (%)                 | 98.9 %                                                                                         |
| Data/restr./param.                                 | 9184 / 7 / 611                                                                                 |
| GOF on <i>F</i> <sup>2</sup>                       | 1.058                                                                                          |
| Final <i>R</i> indices [ <i>I</i> >2σ( <i>I</i> )] | <i>R</i> <sub>1</sub> = 0.0634;<br><i>wR</i> <sub>2</sub> = 0.1531                             |
| <i>R</i> indices (all data)                        | <i>R</i> <sub>1</sub> = 0.0837;<br><i>wR</i> <sub>2</sub> = 0.1641                             |
| Largest diff. peak and hole / e.Å <sup>-3</sup>    | 1.089 and -0.690                                                                               |

## 2Ru: 0h

RuPTHy#1 RT: 0.00 AV: 1 NL: 3.80E4  
T: FTMS + c ESI Full ms [100.00-1700.00]

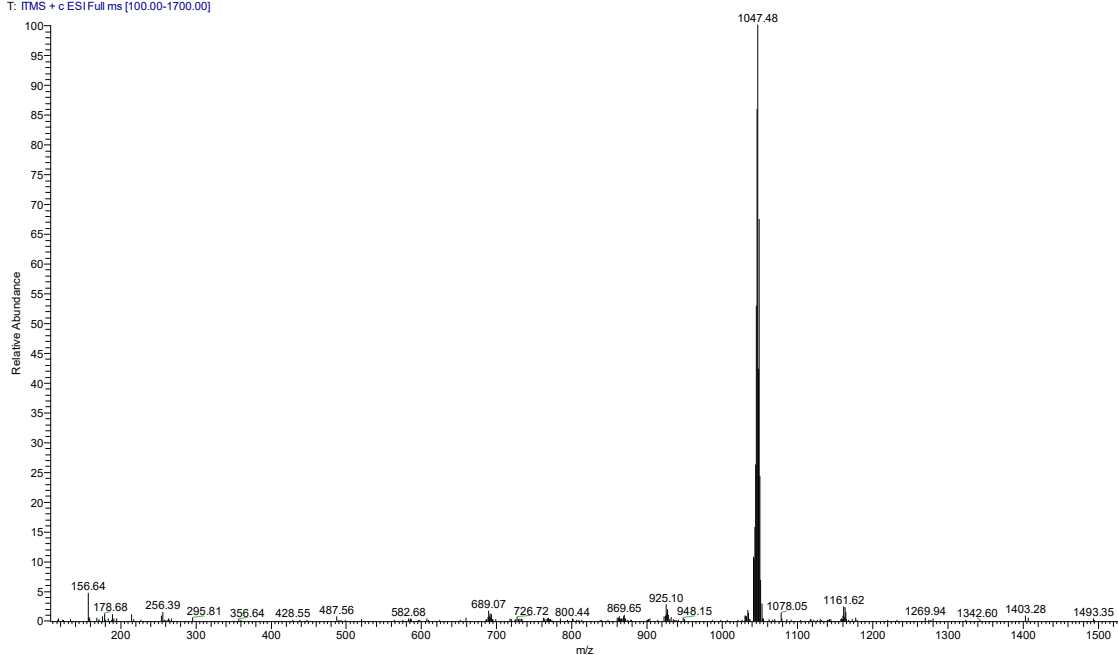

## 2Ru: 72h

RuPTHy\_72h#25-182 RT: 0.17-1.26 AV: 158 NL: 1.03E5  
F: FTMS + c ESI Full ms [100.00-1500.00]

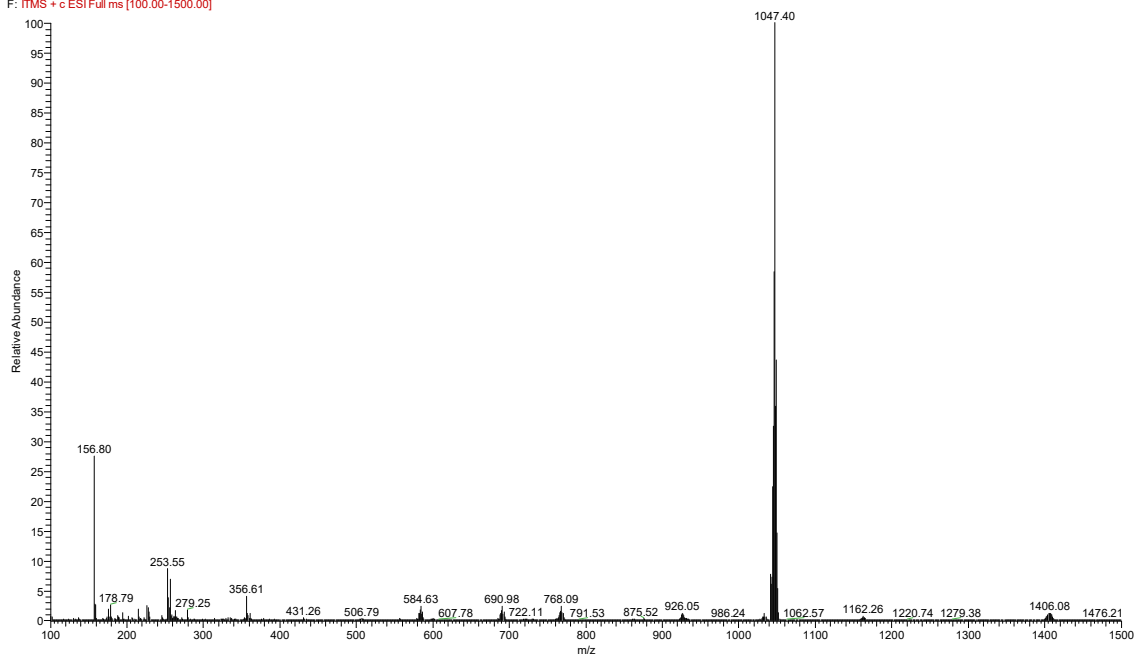

**Figure S1-A:** ESI(+)-MS spectra of **2Ru**, at 0h (top) and after 72h (bottom) of incubation in H<sub>2</sub>O/DMSO (19:1).



### 5Ru: 0h

RuDLup #14-123 RT: 0.10-0.94 AV: 110 NL: 8.26E3  
F: ITMS + c ESI Full ms [100.00-1200.00]

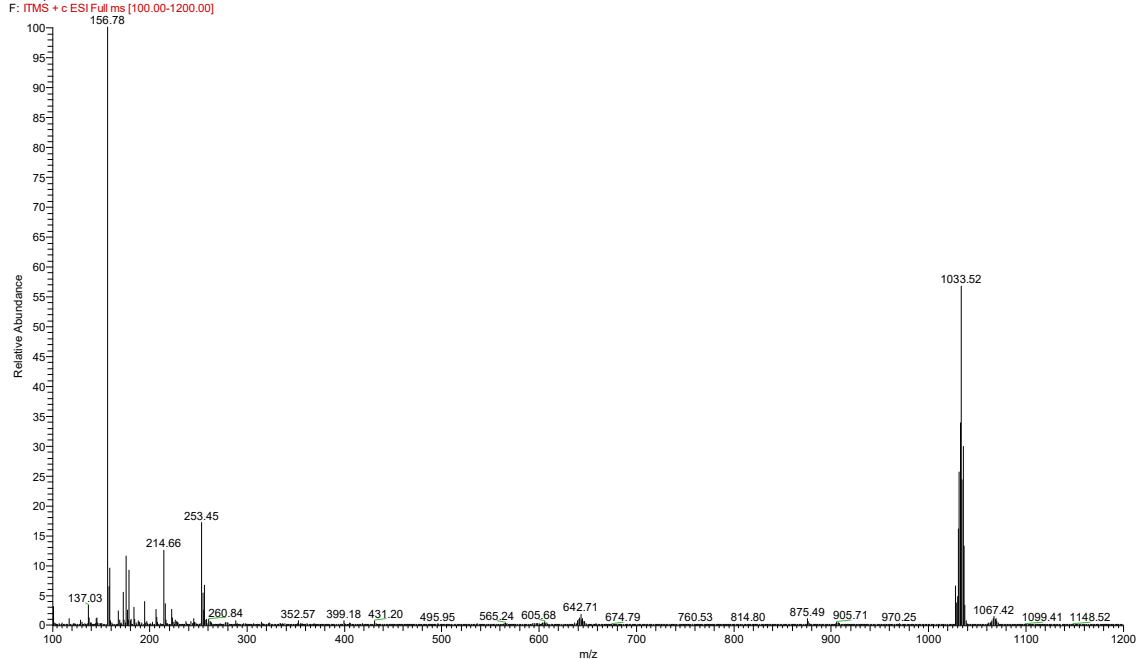

### 5Ru: 72h

RuDLup\_72h #9-98 RT: 0.09-1.12 AV: 90 NL: 8.23E3  
F: ITMS + c ESI Full ms [100.00-1500.00]

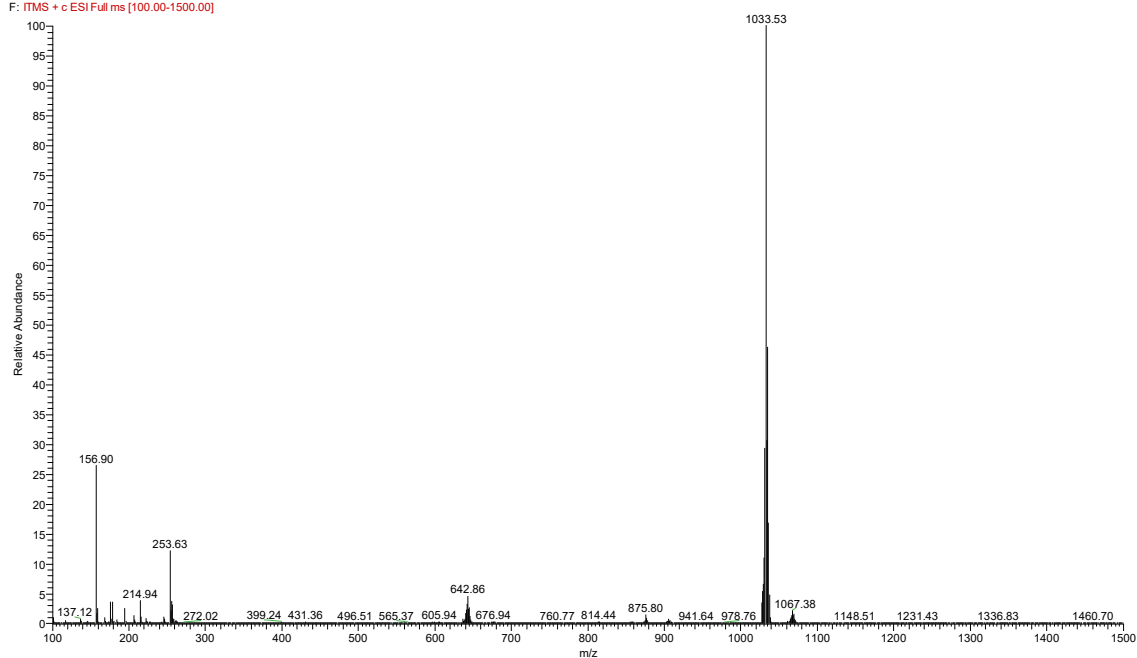

**Figure S1-B:** ESI(+)-MS spectra of **5Ru**, at 0h (top) and after 72h (bottom) of incubation in H<sub>2</sub>O/DMSO (19:1).

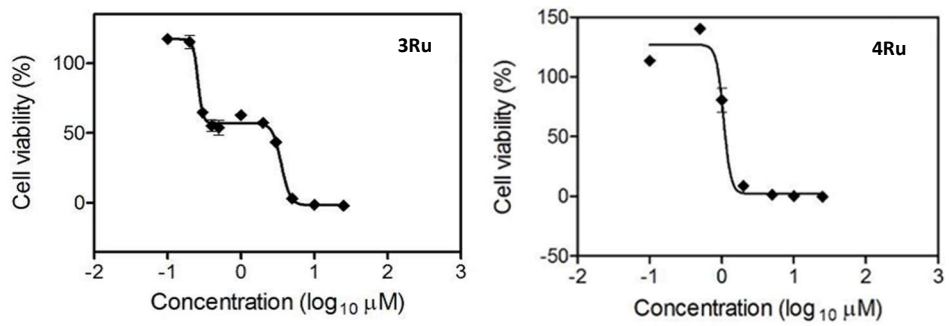

**Figure S2.** Abnormal (**3Ru**) vs normal (**4Ru**) dose-response curves.
